# Issues and Events

## ADA Events

**21st Annual Conference on Diabetes Mellitus**  
27–28 April 2012  
Seminole Hard Rock Resort  
Ft. Lauderdale, Florida  
Contact: Beatriz Gomez-Galan  
E-mail: bggalan@diabetes.org  
Web site: <http://professional.diabetes.org/sfl>

**27th Clinical Conference on Diabetes**  
24–27 May 2012  
Hyatt Regency Coconut Point  
Bonita Springs, Florida  
Contact: Pauline Lowe  
E-mail: plowe@diabetes.org  
Web site: <http://professional.diabetes.org/cc>

**72nd Scientific Sessions**  
8–12 June 2012  
Pennsylvania Convention Center  
Philadelphia, Pennsylvania  
Web site: <http://scientificsessions.diabetes.org>

**Endocrinology Seminar**  
27 September 2012  
Cromwell, Connecticut  
Contact: Louise Butcher  
E-mail: lbutter@diabetes.org

**Annual Diabetes Practice Update**  
5 October 2012  
Oregon Convention Center  
Portland, Oregon  
Contact: Kris Bockmier  
E-mail: kbockmier@diabetes.org

**38th Annual Diabetes Symposium**  
3 November 2012  
Wichita, Kansas  
Contact: Patricia Tasker  
E-mail: ptasker@diabetes.org

**Annual Symposium on Diabetes for the Health Care Professional**  
7 November 2012  
Cromwell, Connecticut  
Contact: Louise Butcher  
E-mail: lbutter@diabetes.org

**10th Professional Symposium on Diabetes**  
10 November 2012  
Honolulu, Hawaii  
Contact: Lawrence "LJ" Duenas  
E-mail: lduenas@diabetes.org

**1st American Diabetes Association Middle East Congress**  
4–6 December 2012  
Dubai International Convention and Exhibition Centre  
Dubai, United Arab Emirates  
Web site: <http://ada-me.org/index.html>  
Contact for information: EDC, Center for Diabetes Education, 3119  
Trees of Avalon Parkway, McDonough, GA 30253. Tel: 678-759-1561.  
E-mail: info@ada-me.org

**73rd Scientific Sessions**  
21–25 June 2013  
McCormick Place Convention Center  
Chicago, Illinois  
Web site: <http://scientificsessions.diabetes.org>

**Contact for information on ADA events:** American Diabetes Association, 1701 N. Beauregard St., Alexandria, VA 22311. Tel: 800-232-3472, select option 1. Fax: 703-549-1715 or 703-253-4358. E-mail: [professionaleducation@diabetes.org](mailto:professionaleducation@diabetes.org). Web site: <http://professional.diabetes.org/ce>.

## Other Events

**Circadian Clocks and Metabolic Disease**  
2012 UCLA Symposium  
20–22 April 2012  
Lake Arrowhead Conference Center  
Lake Arrowhead, California  
Web site: <http://www.ccmdsymposium.med.ucla.edu>

**2nd International Conference on Hyperphagia**  
17–20 October 2012  
Pennington Biomedical Research Center  
Louisiana State University  
Baton Rouge, Louisiana  
Web site: [www.hyperphagia.org](http://www.hyperphagia.org)

**3rd International Symposium on Adipobiology and Adipopharmacology (ISAA)**  
25–27 October 2012  
Burgas, Bulgaria  
Abstract (2 double-spaced pages) submission deadline: 25 August 2012  
Contact: George N. Chaldakov  
E-mail: [chaldakov@yahoo.com](mailto:chaldakov@yahoo.com)
